## CORRECTION

# Epigenetic regulation of *Atoh1* guides hair cell development in the mammalian cochlea

Zlatka P. Stojanova, Tao Kwan and Neil Segil

There was an error published in Development **142**, 3529-3536.

The concentrations of two drugs were wrongly reported. The correct values are 200 nM (not 500  $\mu$ M) TSA and 500  $\mu$ M (not 200 nM) VPA. Corrected sentences read as follows.

On p. 3531: To test the requirement for histone deacetylation of *Atoh1* during postnatal downregulation, we treated P1 organ cultures for 6 or 24 h with 500  $\mu$ M valproic acid (VPA), a broad-spectrum histone deacetylase inhibitor (HDACi) (Göttlicher et al., 2001) (Fig. 3C).

On p. 3534: Embryonic cochlear cultures were placed directly in the drug/vehicle; postnatal cultures were allowed to recover for 2-3 hours before administering the drugs [30  $\mu$ M curcumin (Enzo Life Sci, ALX-350-M010), 250  $\mu$ M BA (Enzo Life Sci, ALX-778-649-18-6), 200 nM TSA (Sigma) and 500  $\mu$ M VPA (Sigma)].

The authors apologise to readers for this mistake.
